# Supplementary material for: Correction of Chromatography-Mass Spectrometry Long-term Instrumental Drift using Quality Control Samples over 155 days
Source: Research Square preprint supplement (doi:10.21203/rs.3.rs-7401283/v1), 2025-09-04
Supplement: Supplementary file 1 [file 68b8958324e98077b17b7a93.docx]

Supporting Information

Correction of Chromatography-Mass Spectrometry Long-term Instrumental Drift using Quality Control Samples over 155 days

Jie YU1, Tong AN1, Daifeng CHEN3, Shining ZONG2, Dongxiao BAI2, Dawei QI1, Luning ZHANG2,*& Junming SHI3,*

1. Technical Center, Shanghai Tobacco Group Co. Ltd., Shanghai 201315, China. 2. School of Chemical Science and Engineering, Tongji University, Shanghai 200082, China. 3. Shanghai Cigarette Factory, Shanghai Tobacco Group Co. Ltd., Shanghai 201315, China. Correspondence and requests for materials should be addressed to L.Z. (luningzhang@tongji.edu.cn) and J. S. (shijm@sh.tobacco.com.cn)

In Figure S1, we show the chromatograms of Quality Control samples numbered QC-1-4 and QC-7-4 which are the 1st and 14th QC among the 20 measurements. Notice that due to batch effect, instrument maintenance, and random error, the two results are different not only in signal magnitude, but also in the number of peaks, and retention time. Recognition of chemical species should be followed by alignment of retention time of each species, before applying any mathematical models for data correction.

Figure S1. Gas chromatography results of QC samples (a) QC-1-4 and (b) QC-7-4. The signal magnitude is calculated from each peak’s mass spectrometry ion number density.

In Figure S2, we show the chromatograms of Quality Control samples of all 20 measurements in the range of 33-50 min retention time. The demonstrated limonene data in Figure 3 in the main text is from this region, with the peak labeled as “*” in this figure. Some other chemicals in the eluates are also labeled with chemical structures shown. It is obvious from this figure that retention time and magnitude of the limonene peaks changed during the 155 days.

Figure S2. Gas chromatography results of QC samples. The chromatography signal magnitude is from each peak’s mass spectrometry ion number density. In plot (a) from bottom to top, QC-1-4, QC-1-14, QC-1-24, QC-2-4, QC-2-14, QC-3-24, QC-4-4, QC-5-13, QC-5-23, and QC-6-4. In plot (b) from bottom to top, QC-6-65, QC-6-75, QC-6-85, QC-7-4, QC-7-14, QC-7-24, QC-7-34, QC-7-98, QC-7-175, and QC-7-185. In plot (c) chemical structures of six different species are shown, limonene is labeled as “*”. Chemical structures were obtained from mass spectrometry results.

In Figure S3, we show the chromatograms of 20 measurements of S1 samples in the range of 33-50 min retention time. The demonstrated limonene data in Figure 4 in the main text is from this region, with the corresponding peak labeled as “*” in this figure. Some other chemicals in the eluates are similar to the ones shown in Figure S2.

Figure S3. Gas chromatography results of 20 measurement on S1 samples with limonene labeled as “*”. The chromatography signal magnitude is from each peak’s mass spectrometry ion number density. In plot (a) from bottom to top, S1-1-5, S1-1-15, S1-1-25, S1-2-5, S1-2-15, S1-3-25, S1-4-5, S1-5-14, S1-5-24, and S1-6-5. In plot (b) from bottom to top, S1-6-66, S1-6-76, S1-6-86, S1-7-5, S1-7-15, S1-7-25, S1-7-35, S1-7-99, S1-7-176, and S1-7-186.

In Table S1, we list the corresponding labels of 20 repeated measurements on QC and S1 samples, together with their testing dates in 2024 for reference.

**Table S1.** List of 20 measurements of QC and S1 with the corresponding labels, the cumulative days up to 155, and the actual experimental dates in 2024.

| Day | Numerical Sequence # | QC  Label | S1  Label | Actual dates  (mm-dd)  In 2024 |
| --- | --- | --- | --- | --- |
| 1 | 1 | QC-1-4 | S1-1-5 | 03-15 |
| 2 | 2 | QC-1-14 | S1-1-15 | 03-18 |
| 6 | 3 | QC-1-24 | S1-1-25 | 03-20 |
| 57 | 4 | QC-2-4 | S1-2-5 | 05-10 |
| 62 | 5 | QC-2-14 | S1-2-15 | 05-15 |
| 78 | 6 | QC-3-24 | S1-3-25 | 05-31 |
| 83 | 7 | QC-4-4 | S1-4-5 | 06-05 |
| 91 | 8 | QC-5-13 | S1-5-14 | 06-13 |
| 97 | 9 | QC-5-23 | S1-5-24 | 06-19 |
| 102 | 10 | QC-6-4 | S1-6-5 | 06-24 |
| 116 | 11 | QC-6-65 | S1-6-66 | 07-08 |
| 120 | 12 | QC-6-75 | S1-6-76 | 07-12 |
| 123 | 13 | QC-6-85 | S1-6-86 | 07-15 |
| 127 | 14 | QC-7-4 | S1-7-5 | 07-19 |
| 130 | 15 | QC-7-14 | S1-7-15 | 07-22 |
| 131 | 16 | QC-7-24 | S1-7-25 | 07-23 |
| 134 | 17 | QC-7-34 | S1-7-35 | 07-26 |
| 141 | 18 | QC-7-98 | S1-7-99 | 08-02 |
| 153 | 19 | QC-7-175 | S1-7-176 | 08-14 |
| 155 | 20 | QC-7-185 | S1-7-186 | 08-16 |
